# Supplementary material for: The Spray-Dried Alginate/Gelatin Microparticles with Luliconazole as Mucoadhesive Drug Delivery System
Source: MDPI journal article supplement (doi:10.3390/ma16010403), 2023-01-01
Supplement: s1 [file s1]

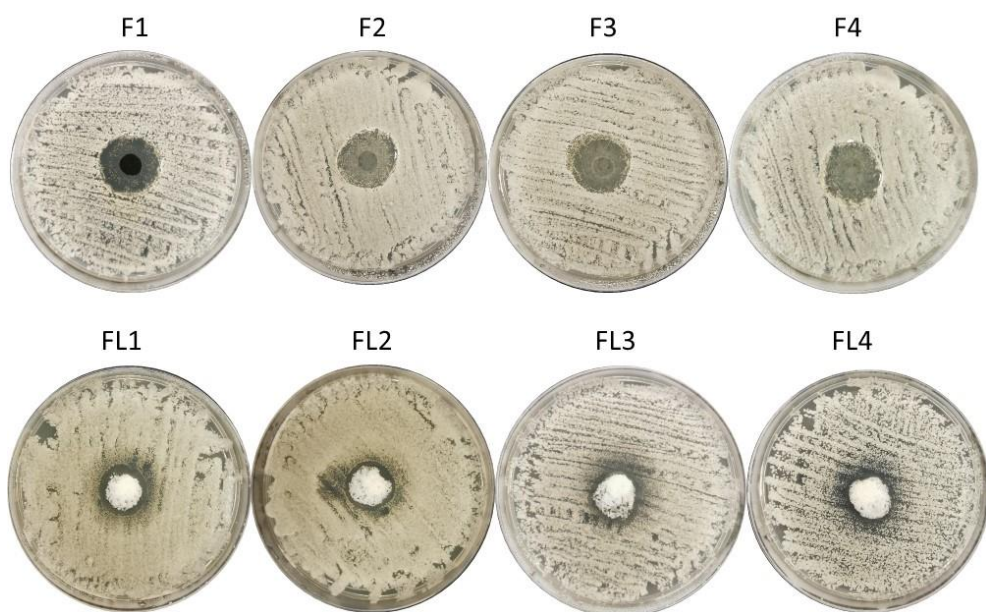

(a)

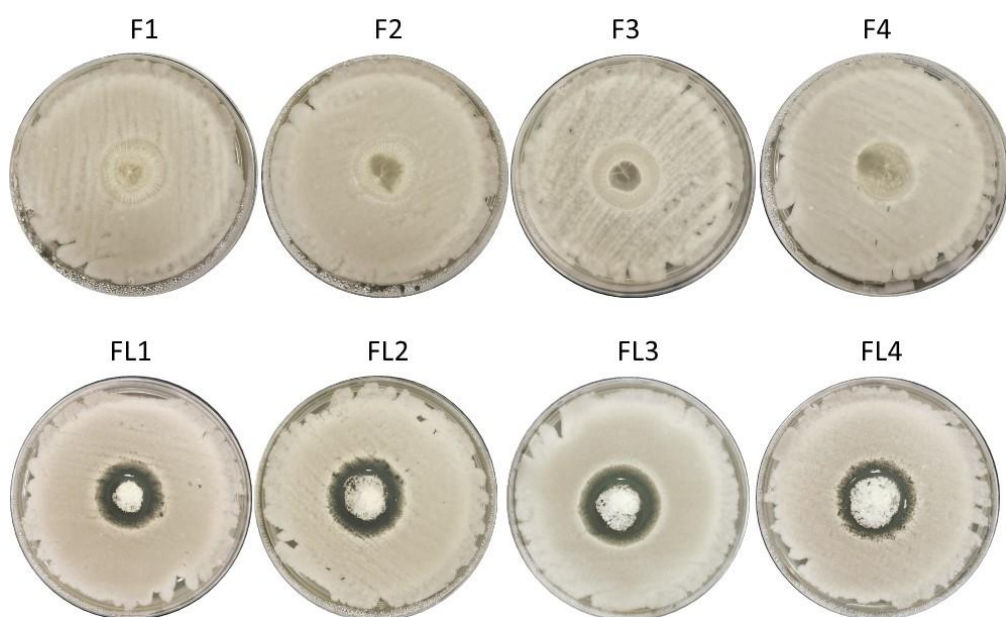

(b)

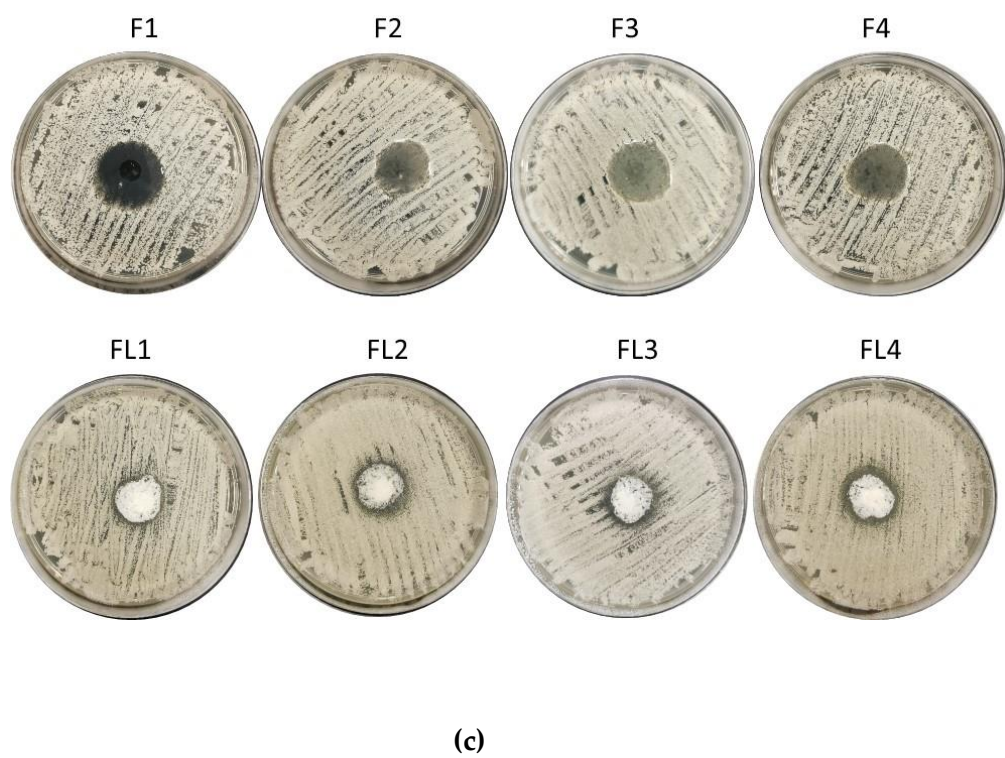

**Figure S1:** Representative images of zone inhibition in (a) *Candida albicans*, (b) *Candida krusei* and (c) *Candida parapsilosis* strains.
